# Supplementary material for: UHPLC-HRMSn Analysis Reveals the Dynamic Metabonomic Responses of Salvia miltiorrhiza Hairy Roots to Polysaccharide Fraction from Trichoderma atroviride
Source: MDPI journal article supplement (doi:10.3390/biom9100541), 2019-09-27
Supplement: s1 [file s1]

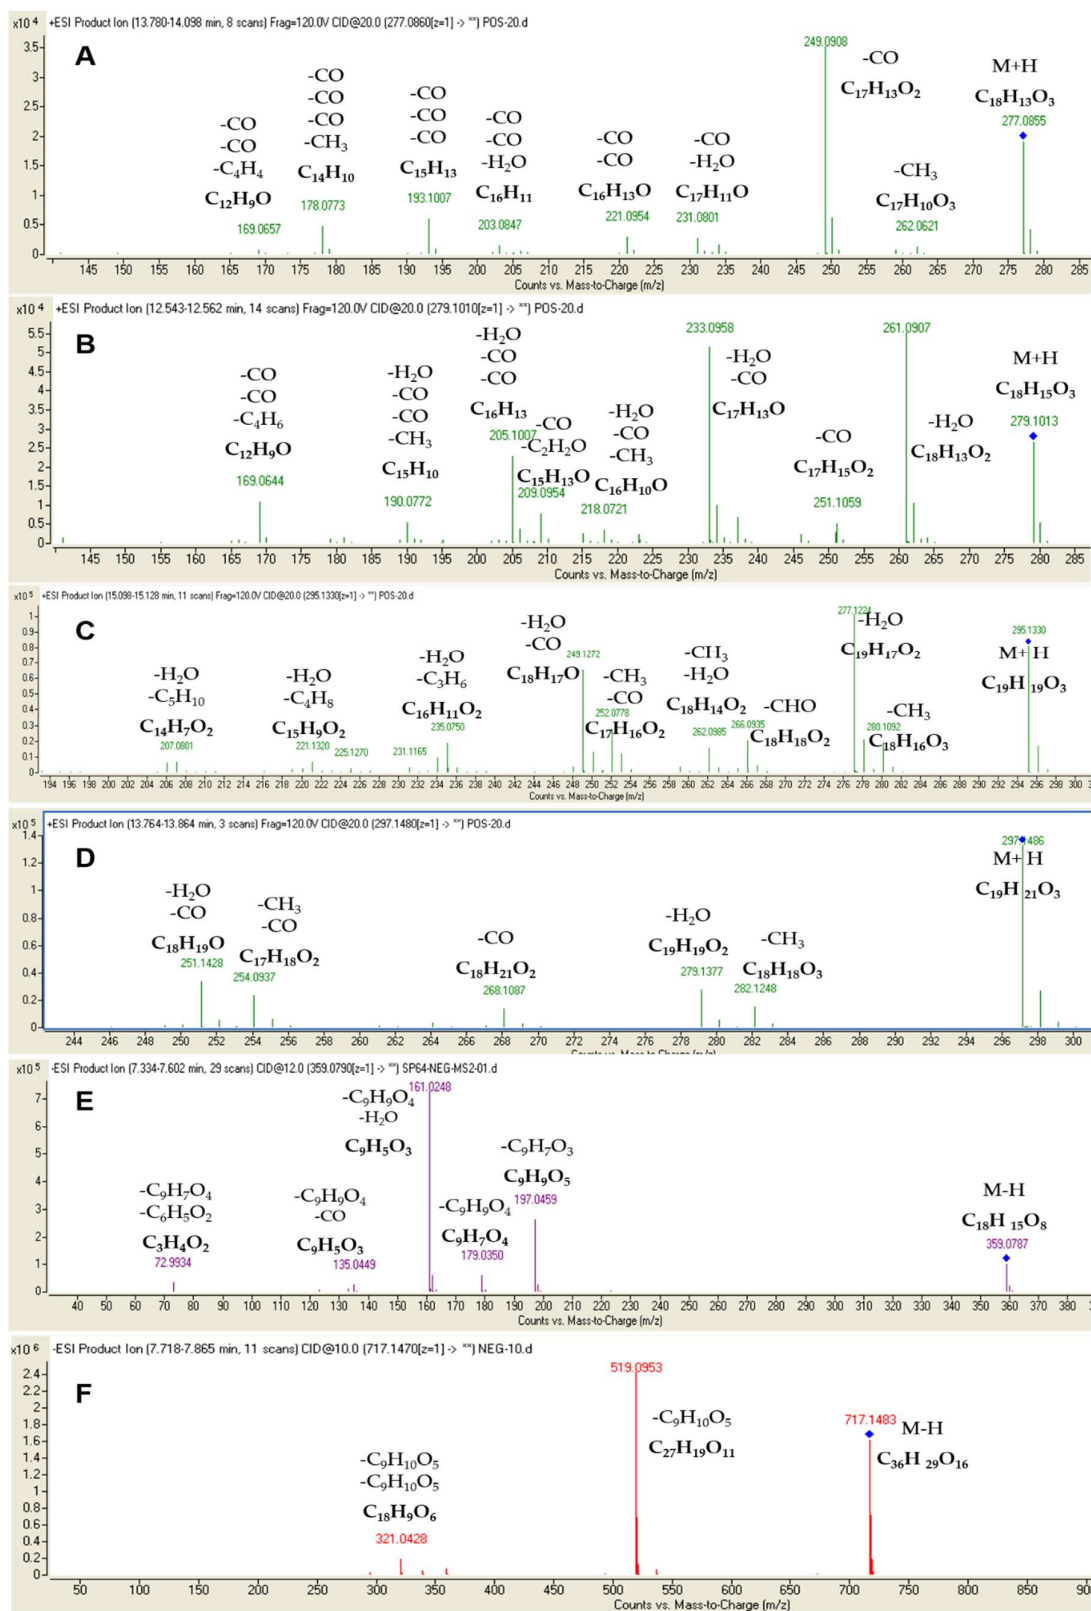

Figure S1 The MS/MS spectra of the metabolites identified by compared with the references (A, Tanshinone I; B, Dihydrotanshinone I; C, Tanshinone IIA; D, Cryptotanshinone; E, Rosmarinic acid; F, Salvianolic acid B)
